# Supplementary material for: MALAT1 long ncRNA promotes gastric cancer metastasis by suppressing PCDH10
Source: PubMed Central journal article supplement (PMC4914315; doi:10.18632/oncotarget.7281), 2016-02-09
Supplement: oncotarget-07-12693-s001.pdf [file oncotarget-07-12693-s001.pdf]

## MALAT1 long ncRNA promotes gastric cancer metastasis by suppressing *PCDH10*

### Supplementary Materials

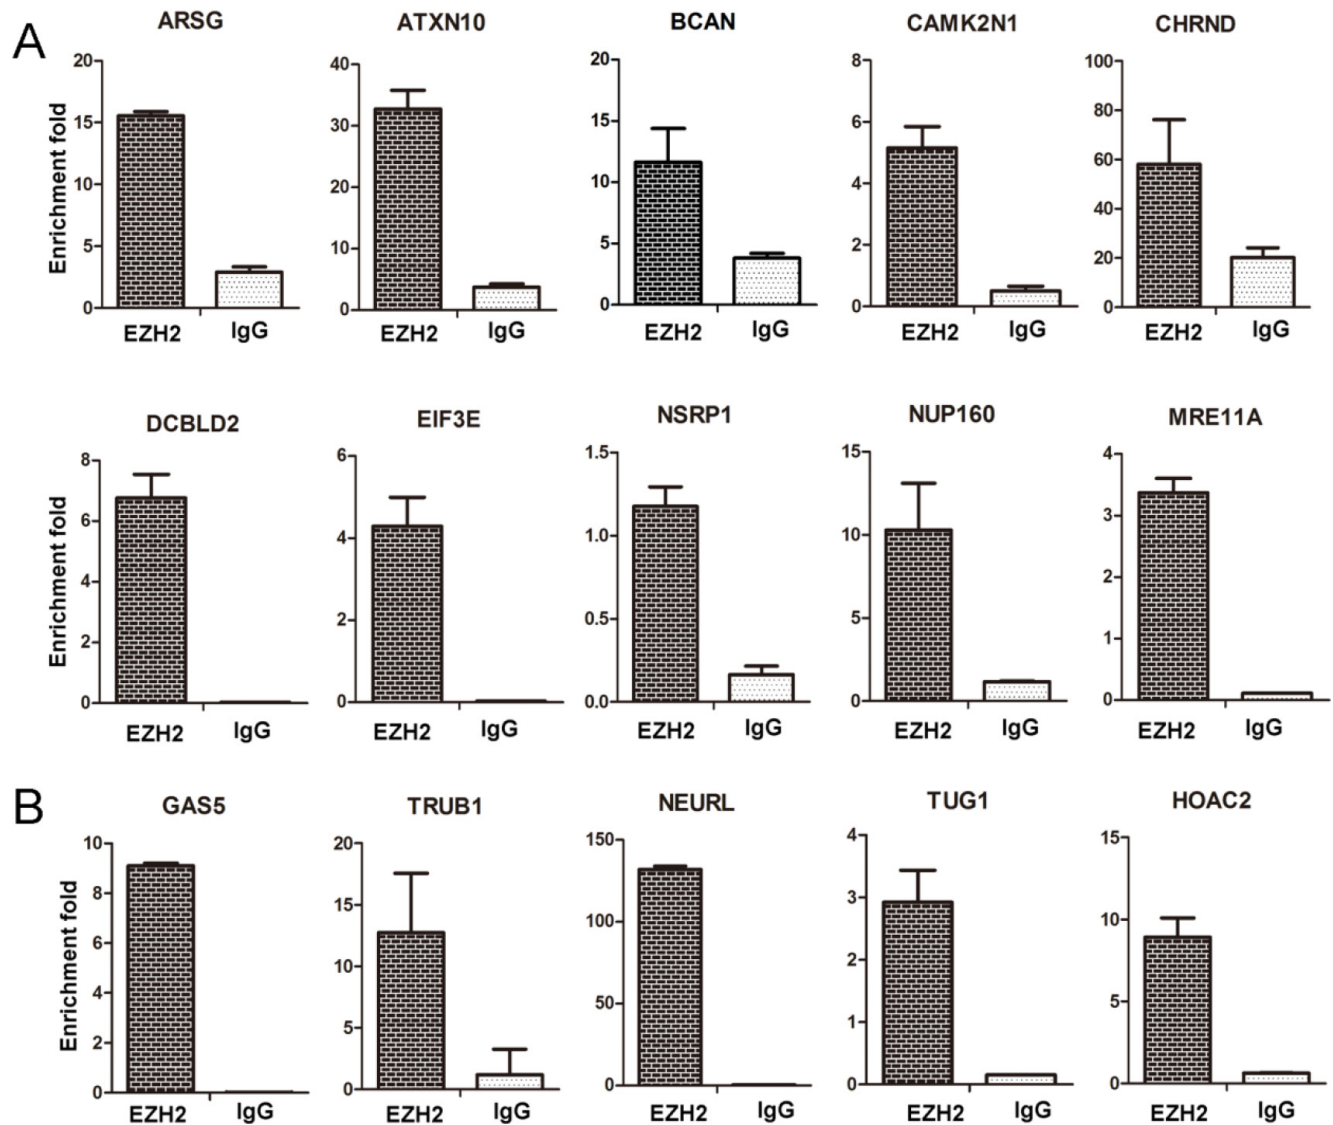

**Supplementary Figure S1: RIP-qPCR validation.** (A) Comparison of EZH2 and IgG pull-downs for several selected transcripts around the threshold by native RIP and RT-qPCR. (B) Validation of EZH2-bound transcripts captured by RIP under more stringent conditions with RT-qPCR.

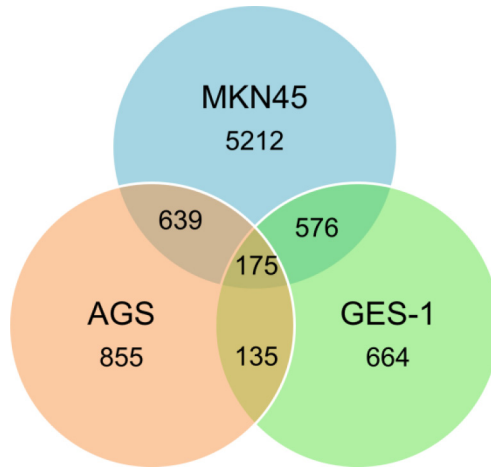

Supplementary Figure S2: A Venn diagram of the number of EZH2-bound transcripts identified in three cell lines.

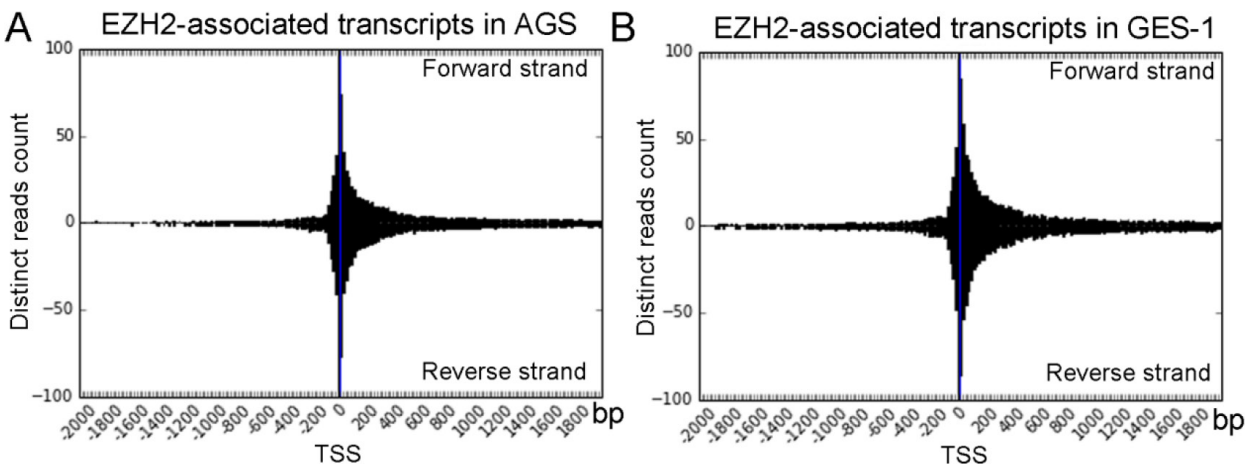

Supplementary Figure S3: Distinct reads from the EZH2-associated transcripts were plotted as a function of distance from TSS in AGS (A) and GES-1 cells (B).

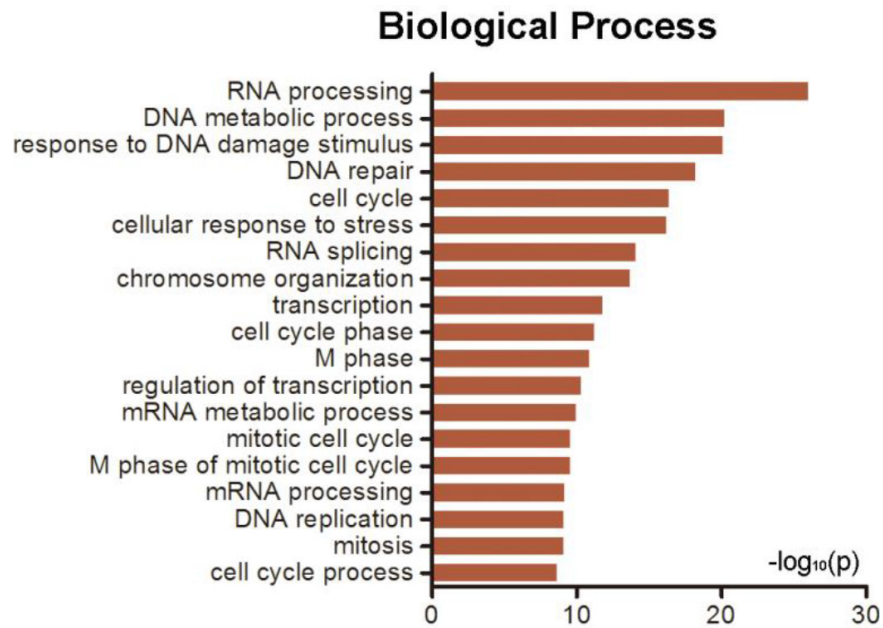

Supplementary Figure S4: Functional annotation of EZH2-associated mRNAs.

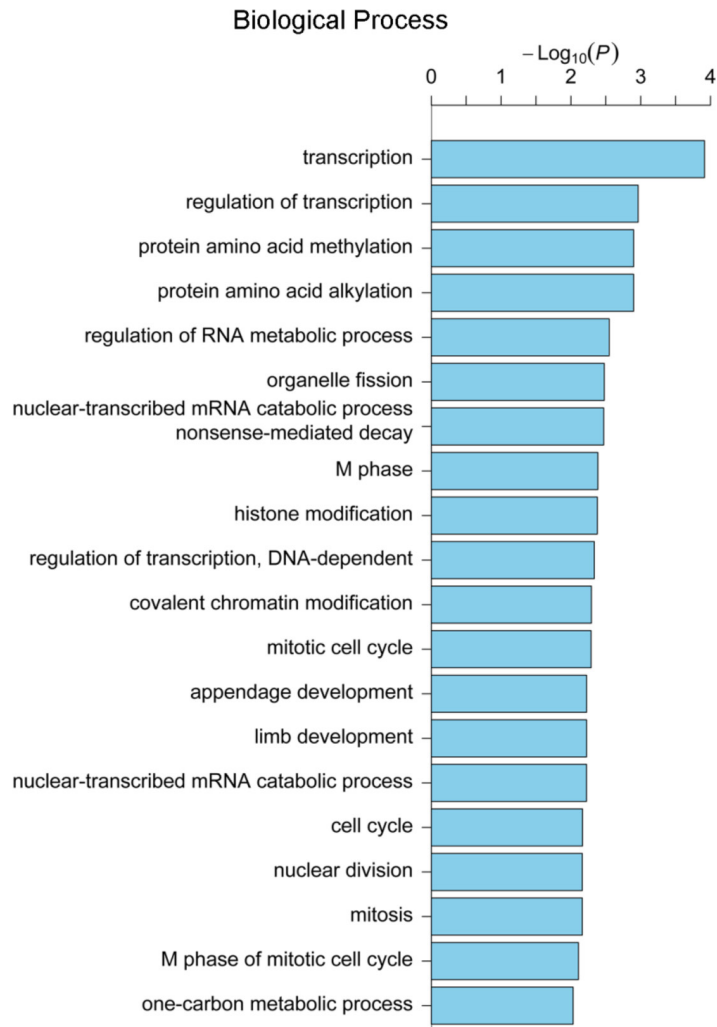

Supplementary Figure S5: A selection of the top enriched GO items for EZH2-interacting antisense transcripts.

### Supplementary Table S1: Mapping statistics of RIP-seq data sets

| Library    | Total reads | Reads remaining after filtering | Total distinct reads | Number of reads |                |            |
|------------|-------------|---------------------------------|----------------------|-----------------|----------------|------------|
|            |             |                                 |                      | ncRNA           | protein_coding | pseudogene |
| GES-1 EZH2 | 14343655    | 5288748                         | 1277042              | 47459           | 311418         | 7183       |
| GES-1 IgG  | 8712659     | 6463507                         | 541162               | 14358           | 103734         | 7306       |
| AGS EZH2   | 11674023    | 9799354                         | 708808               | 10754           | 227219         | 2393       |
| AGS IgG    | 14373546    | 12439745                        | 1241987              | 15521           | 198640         | 6940       |
| MKN45 EZH2 | 15222754    | 13842164                        | 1100871              | 14888           | 151480         | 5342       |
| MKN45 IgG  | 9031079     | 6272332                         | 443481               | 5423            | 50807          | 688        |

### Supplementary Table S2: EZH2-associated transcriptome in different cell lines

### Supplementary Table S3: GO analysis of EZH2- interacting transcripts derived from cancer-related genes

### Supplementary Table S4: RNA-seq analysis in MKN45

### Supplementary Table S5: The lists of primers used in this study in adaptors of cDNA library

| Name      | Sequence (5'-3')                                                                                 |            |
|-----------|--------------------------------------------------------------------------------------------------|------------|
| Adaptor 1 | GTGCTCTCCGATCTAGAGCANNNNNNNNN                                                                    |            |
| Adaptor 2 | ACCGAGATCTACACTCTTCCCTACACGACGCTCTTCCGATCTNNNNNNN<br>AGATCGGAAGAGCGTCGTGTAGGGAAAGAGTGTAGATCTCGGT | top<br>bot |

### RIP-qPCR primers

| Name     | Sequence (5'-3')       |
|----------|------------------------|
| U1-F     | ATACTTACCTGGCAGGGGAG   |
| U1-R     | CAGGGGGAAAGCGCGAACGCA  |
| MRE11A-F | CTCTCACCCAGACCCACCTA   |
| MRE11A-R | GATGCTGTGCTACCTACCC    |
| CHRND-F  | CCCCTACTCCTACAACGTGC   |
| CHRND-R  | CTCCTCTCTCAGACCCTGCT   |
| NSRP1-F  | GTCCATGCCTGTAGTCCAG    |
| NSRP1-R  | TGGCATGATCATACTCACTGT  |
| EIF3E-F  | CCCCTCACCTCCTTTACAGAG  |
| EIF3E-R  | GACTTGACTACTCGCATCGC   |
| NUP160-F | CGCCCTCCTATCTTGTGCAG   |
| NUP160-R | GGAACCCTGTACTCAAGGCC   |
| ATXN10-F | GTTAGGGCTGTGTAGGGCG    |
| ATXN10-R | GAAGGCGAGGAGGACGAAG    |
| ARSG-F   | ACAAGAGGACAGAAGCCAAACT |
| ARSG-R   | AGGTTGGCAGTGTCTTTGT    |
| BCAN-F   | CATGTCCCTCTGTCAAGCCTG  |
| BCAN-R   | AGCTGTCTCCTTCCAGAACA   |

|           |                       |
|-----------|-----------------------|
| CAMK2N1-F | ATCTGTCTCCCGGCTGATA   |
| CAMK2N1-R | CGGCGGTAACAGTTATTGGC  |
| DCBLD2-F  | GGTTCCCCGTAGCCTTGA    |
| DCBLD2-R  | GCCTGAGTATGCAACCCCAA  |
| GAS5-F    | TCGTACTGACGAAGGTGCAT  |
| GAS5-R    | AGATGGGCGTCACTACTGCT  |
| TRUB1-F   | GCTACCAAGCTGCTGTCTT   |
| TRUB1-R   | TCTCCTTCAACCGATTGAGC  |
| HDAC2-F   | GAAAAGGGCTGAGGGAAACG  |
| HDAC2-R   | GTGGTACCGAGCCTTCCC    |
| TUG1-F    | GTCTTTGACCCAGGAATGA   |
| TUG1-R    | TCCCATTCTAGGAATCACTGG |
| NEURL-F   | ACAGGGAGACCTTGTGATGG  |
| NEURL-R   | GAACCTGGAGGTGTGAGAGG  |

### ChIP-qPCR primers

| Name                       | Sequence (5'-3')     |
|----------------------------|----------------------|
| GAPDH-F                    | AAGACCTGGGCTGGGACT   |
| GAPDH-R                    | GCTGCGGGCTCAATTTATAG |
| PCDH10-F for anti-EZH2     | GGCTTGGGAAGAAAACAGCA |
| PCDH10-R for anti-EZH2     | TCCCTCTGTCCTCATCTCCA |
| PCDH10-F for anti-H3K27me3 | TCCGCTCAAGTCTTCCTTT  |
| PCDH10-R for anti-H3K27me3 | CAGTCAGGGTGTAGGAGTCC |

### RNAi-qRT-PCR primer

| Name          | Sequence (5'-3')        |
|---------------|-------------------------|
| EZH2 mRNA-F   | TTGTTGGCGGAAGCGTGAAAATC |
| EZH2 mRNA-R   | TCCCTAGTCCCGCGCAATGAGC  |
| GAPDH mRNA-F  | GCACCGTCAAGGCTGAGAAC    |
| GAPDH mRNA-R  | ATGGTGGTGAAGACGCCAGT    |
| MALAT1 mRNA-F | AAAGCAAGGTCTCCCCACAAG   |
| MALAT1 mRNA-R | GGTCTGTGCTAGATCAAAAGGCA |
| PCDH10-mRNA-F | CAGACCTCGCCGAGTTAACA    |
| PCDH10-mRNA-R | ACGGTTGGTGGCATCATGAT    |
